# Supplementary material for: The Feasibility of Less-Invasive Bentall Surgery: A Real-World Analysis
Source: MDPI journal article supplement (doi:10.3390/life13112204), 2023-11-13
Supplement: s1 [file s1]

Supplemental Table S1: Prostheses used in the matched cohorts

| Matched cohorts                                 |                     |                   |                  |                  |              |
|-------------------------------------------------|---------------------|-------------------|------------------|------------------|--------------|
|                                                 |                     | Total<br>n=294    | FS<br>n=196      | PS<br>n=98       | p-value      |
| <b>Mechanical prostheses</b>                    | <b><i>n (%)</i></b> | <b>93 (31.6)</b>  | <b>74 (37.8)</b> | <b>19 (19.4)</b> | <b>0.003</b> |
| <i>Mechanical valved conduits</i>               |                     |                   |                  |                  |              |
| ATS Aortic Valved Graft                         | <i>n (%)</i>        | 76 (25.9)         | 58 (29.6)        | 18 (18.4)        |              |
| SJM Aortic Valved Graft                         | <i>n (%)</i>        | 15 (5.1)          | 14 (4.8)         | 1 (1)            |              |
| <i>Used as "tailor-made" mechanical conduit</i> |                     |                   |                  |                  |              |
| ATS Open Pivot                                  | <i>n (%)</i>        | 2 (0.7)           | 2 (1)            | 0 (0)            |              |
| <b>Biological prostheses</b>                    | <b><i>n (%)</i></b> | <b>201 (68.4)</b> | <b>123</b>       | <b>78 (79.6)</b> | <b>0.003</b> |
| <i>Biological valved conduits</i>               |                     |                   |                  |                  |              |
| Medtronic Freestyle                             | <i>n (%)</i>        | 73 (24.8)         | 41 (20.9)        | 32 (32.7)        |              |
| SJM Toronto Root                                | <i>n (%)</i>        | 50 (17)           | 24 (12.2)        | 26 (26.5)        |              |
| Vascutek BioValsalva                            | <i>n (%)</i>        | 7 (2.4)           | 7 (3.6)          | 0 (0)            |              |
| <i>Used as "tailor-made" biological conduit</i> |                     |                   |                  |                  |              |
| CE Perimount Magna-Ease                         | <i>n (%)</i>        | 8 (2.7)           | 6 (3.1)          | 2 (2)            |              |
| CE Perimount                                    | <i>n (%)</i>        | 61 (20.7)         | 43 (21.9)        | 18 (18.4)        |              |
| Medtronic Avalus                                | <i>n (%)</i>        | 1 (0.3)           | 0 (0)            | 1 (1)            |              |
| <i>Homografts</i>                               | <i>n (%)</i>        | 1 (0.5)           | 0 (0)            | 1 (1)            |              |

CE=Carpentier-Edwards; FS=full sternotomy; PS=partial sternotomy; SJM=St.Jude Medical
