# Supplementary material for: The Feasibility of Less-Invasive Bentall Surgery: A Real-World Analysis
Source: MDPI journal article supplement (doi:10.3390/life13112204), 2023-11-13
Supplement: s1 [file s1]

Supplemental Table S3: Postoperative outcomes of the unmatched cohorts

| Unmatched cohorts                   |                     |                 |                  |                   |                |              |
|-------------------------------------|---------------------|-----------------|------------------|-------------------|----------------|--------------|
|                                     |                     | Total<br>n=768  | FS<br>n=670      | PS<br>n=98        | OR (95%-CI)    | p-value      |
| Procedure time [min]                | <i>median (IQR)</i> | 189 (161-222)   | 185 (160-220)    | 205 (180-243.8)   | -              | <b>0.008</b> |
| Bypass time [min]                   | <i>median (IQR)</i> | 110 (93-133)    | 110 (92-132)     | 110.5 (100.5-137) | -              | 0.1          |
| Aortic cross-clamp time [min]       | <i>median (IQR)</i> | 85 (71-99)      | 85 (70.3-98.8)   | 83.5 (76-97.75)   | -              | 0.6          |
| Conversion                          | <i>n (%)</i>        | -               | -                | 8 (8.2)           | -              | -            |
| Emergency CABG                      | <i>n (%)</i>        | 19 (2.5)        | 15 (2.2)         | 4 (4.1)           | 1.9 (0.4-6)    | 0.3          |
| IABP                                | <i>n (%)</i>        | 11 (1.4)        | 7 (1)            | 4 (4)             | 4 (0.8-16.2)   | <b>0.04</b>  |
| ECMO                                | <i>n (%)</i>        | 6 (0.8)         | 4 (0.6)          | 2 (2)             | 3.5 (0.3-24.5) | 0.2          |
| Ventilation time [minutes]          | <i>median (IQR)</i> | 570 (360-969)   | 576.3(360-970.2) | 525 (342-921)     | -              | 0.5          |
| ICU length of stay [hours]          | <i>median (IQR)</i> | 19.5 (6.6-25.2) | 19.7(6.8-25.2)   | 17.8 (5.4-25.3)   | -              | 0.5          |
| IMCU length of stay [hours]         | <i>median (IQR)</i> | 36.9 (21-72)    | 36.8 (21-72)     | 37.2 (21.1-71)    | -              | 0.9          |
| Revision for bleeding               | <i>n (%)</i>        | 42 (5.5)        | 31 (4.6)         | 11 (11.2)         | 2.6 (1.1-5.6)  | <b>0.01</b>  |
| Revision for pericardial effusion   | <i>n (%)</i>        | 63 (8.2)        | 58 (8.7)         | 5 (5.1)           | 0.6 (0.2-1.5)  | 0.3          |
| Revision for coronary complications | <i>n (%)</i>        | 8 (1)           | 8 (1.2)          | 0 (0)             | 0 (0-4)        | 0.6          |
| Revision for sternal instability    | <i>n (%)</i>        | 8 (1)           | 7 (1)            | 1 (1)             | 1 (0.02-7.7)   | 1            |
| GI complications                    | <i>n (%)</i>        | 32 (4.2)        | 29 (4.3)         | 3 (3.1)           | 0.7 (0.1-2.3)  | 0.8          |
| Stroke                              | <i>n (%)</i>        | 13 (1.7)        | 10 (1.5)         | 3 (3.1)           | 2.1 (0.4-8.3)  | 0.2          |
| Pacemaker                           | <i>n (%)</i>        | 36 (4.7)        | 34 (5)           | 2 (2)             | 0.4 (0.04-1.6) | 0.3          |
| Respiratory failure                 | <i>n (%)</i>        | 72 (9.4)        | 62 (9.3)         | 10 (10.2)         | 1.1 (0.5-2.3)  | 0.7          |
| Dialysis                            | <i>n (%)</i>        | 34 (4.4)        | 24 (3.6)         | 10 (10.2)         | 3.1 (1.3-6.9)  | <b>0.007</b> |
| In-house death                      | <i>n (%)</i>        | 15 (2)          | 9 (1.3)          | 4 (4.1)           | 3.1 (0.7-11.5) | 0.07         |
| Hospitalisation [days]              | <i>median (IQR)</i> | 11 (8-14)       | 11 (8-14)        | 9.5 (8-12)        | -              | <b>0.02</b>  |

CABG=coronary artery bypass grafting; ECMO=extracorporeal membrane oxygenation; FS=full sternotomy; GI=gastrointestinal; IABP=intraaortic balloon pump; ICU=intensive care unit;IMCU=intermediate care unit;OR=odds ratio; PS=partial sternotomy  
Data compared using Wilcoxon rank sum test or Fisher's exact test. Bold p-values are <0.05, indicating statistical significance
