# Supplementary material for: The Feasibility of Less-Invasive Bentall Surgery: A Real-World Analysis
Source: MDPI journal article supplement (doi:10.3390/life13112204), 2023-11-13
Supplement: s1 [file s1]

Supplemental Table S2: Intraoperative details of the unmatched cohorts

| Unmatched cohorts           |              |                |             |            |                  |
|-----------------------------|--------------|----------------|-------------|------------|------------------|
|                             |              | Total<br>n=768 | FS<br>n=670 | PS<br>n=98 | p-value          |
| Arterial cannulation        |              |                |             |            |                  |
| Central                     | <i>n (%)</i> | 738 (96)       | 646 (96.4)  | 92 (93.9)  | 0.3              |
| Femoral                     | <i>n (%)</i> | 15 (2)         | 9 (1.3)     | 6 (6.1)    | <b>0.007</b>     |
| Axillary                    | <i>n (%)</i> | 15 (2)         | 15 (2.2)    | 0 (0)      | 0.2              |
| Venous cannulation          |              |                |             |            |                  |
| Central                     | <i>n (%)</i> | 738 (96)       | 662 (98.8)  | 76 (77.6)  | <b>&lt;0.001</b> |
| Femoral                     | <i>n (%)</i> | 30 (3.9)       | 8 (1.2)     | 22 (22.4)  | <b>&lt;0.001</b> |
| LV-vent                     |              |                |             |            |                  |
| via pulmonary vein          | <i>n (%)</i> | 747 (97.3)     | 668 (99.7)  | 79 (80.6)  | <b>&lt;0.001</b> |
| via pulmonary artery        | <i>n (%)</i> | 21 (2.7)       | 2 (0.3)     | 19 (19.4)  | <b>&lt;0.001</b> |
| Concomitant procedures      |              |                |             |            |                  |
| LAA occlusion               | <i>n (%)</i> | 18 (2.3)       | 18 (2.7)    | 0 (0)      | 0.6              |
| morrow resection            | <i>n (%)</i> | 32 (4.2)       | 25 (3.7)    | 7 (7.1)    | 0.07             |
| proximal-arch replacement   | <i>n (%)</i> | 21 (2.7)       | 15 (2.2)    | 6 (6.1)    | 0.2              |
| Biological valve prosthesis | <i>n (%)</i> | 507 (66)       | 429 (64)    | 78 (79.6)  | <b>0.001</b>     |

LAA=left atrial appendix; LV=left ventricle; FS=full sternotomy; PS=partial sternotomy

Data compared using Pearson's chi-squared test. Bold p-values are &lt;0.05, indicating statistical significance.
